# Supplementary material
Source: publisher figshare collection journal article supplement (https://acs.figshare.com/ndownloader/files/14915900)
Supplement: Supplementary file 1 [file 14915900]

## Supporting Information

# **Reaction kinetics for the covalent functionalization of two-dimensional MoS<sub>2</sub> by aryl diazonium salts**

Duo O. Li<sup>1,2</sup>, Ximo S. Chu<sup>1</sup>, and Qing Hua Wang<sup>1,2\*</sup>

<sup>1</sup> Materials Science and Engineering, School for Engineering of Matter, Transport and Energy, Arizona State University, Tempe, AZ 85251, USA

<sup>2</sup> Nanosystems Engineering Research Center for Nanotechnology-Enabled Water Treatment, Arizona State University, Tempe, AZ 85251, USA

\* Email: [qhwang@asu.edu](mailto:qhwang@asu.edu)

**7 figures, 8 pages**

## Raman and photoluminescence spectroscopies

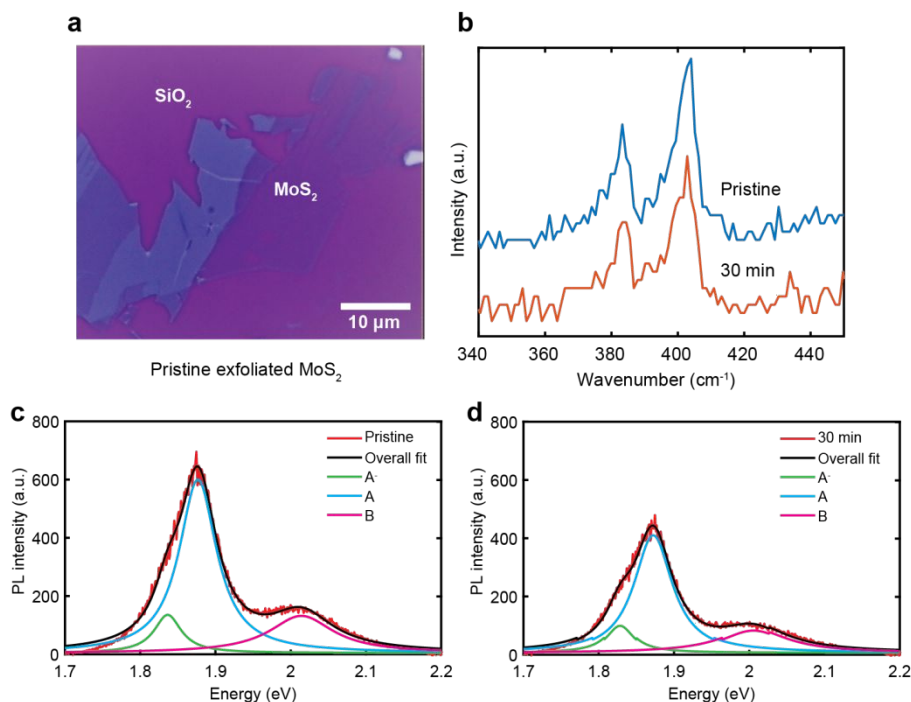

**Figure S1:** Raman and photoluminescence (PL) spectra. **(a)** Representative optical microscopy image of as-exfoliated MoS<sub>2</sub> flake from mechanical exfoliation supported on SiO<sub>2</sub>/Si substrate. **(b)** Raman spectra of pristine monolayer MoS<sub>2</sub> and after 30 min functionalization with 4-NBD at 10 mM. **(c)-(d)** PL spectra of pristine monolayer MoS<sub>2</sub> and after 30 min functionalization, normalized to the intensities of the Raman peaks, and showing curve fitting of the A, A<sup>-</sup> and B excitons.

In general, the minimal change in Raman and PL spectra indicate that the MoS<sub>2</sub> material generally retains its crystal structure and electronic and optical properties after functionalization.

The Raman spectra of MoS<sub>2</sub> before and after functionalization were also discussed in our previous work in Chu et al.,<sup>1</sup> which we will briefly summarize here. The positions and intensities of the characteristic peaks (the E<sub>2g</sub> and A<sub>1g</sub> peaks) indicate that the MoS<sub>2</sub> material remains semiconducting and in the same 2H phase. The LA(M) peak at around 225 cm<sup>-1</sup> (which is usually associated with structural defects for MoS<sub>2</sub>)<sup>2</sup> is not observed in any of our spectra. We attribute the lack of this peak to the defect concentration below the threshold where it would be strong enough to be detected. In addition, the C-S bond may not be distorting the MoS<sub>2</sub> lattice enough to generate a significant LA(M) peak.

The PL spectrum shows a large peak at about 1.88 eV for the A exciton, and a smaller peak at about 2.02 eV for the B exciton, and there is also a smaller A<sup>-</sup> trion peak. There is a decrease of the A exciton intensity by about 35% upon functionalization. This decrease is consistent with more detailed PL measurements from our earlier work in Chu et al.<sup>1</sup> which we interpret as due to primarily n-doping upon functionalization with 4-NBD because of the electron-donating NO<sub>2</sub> group.

## AFM images from isotherm study

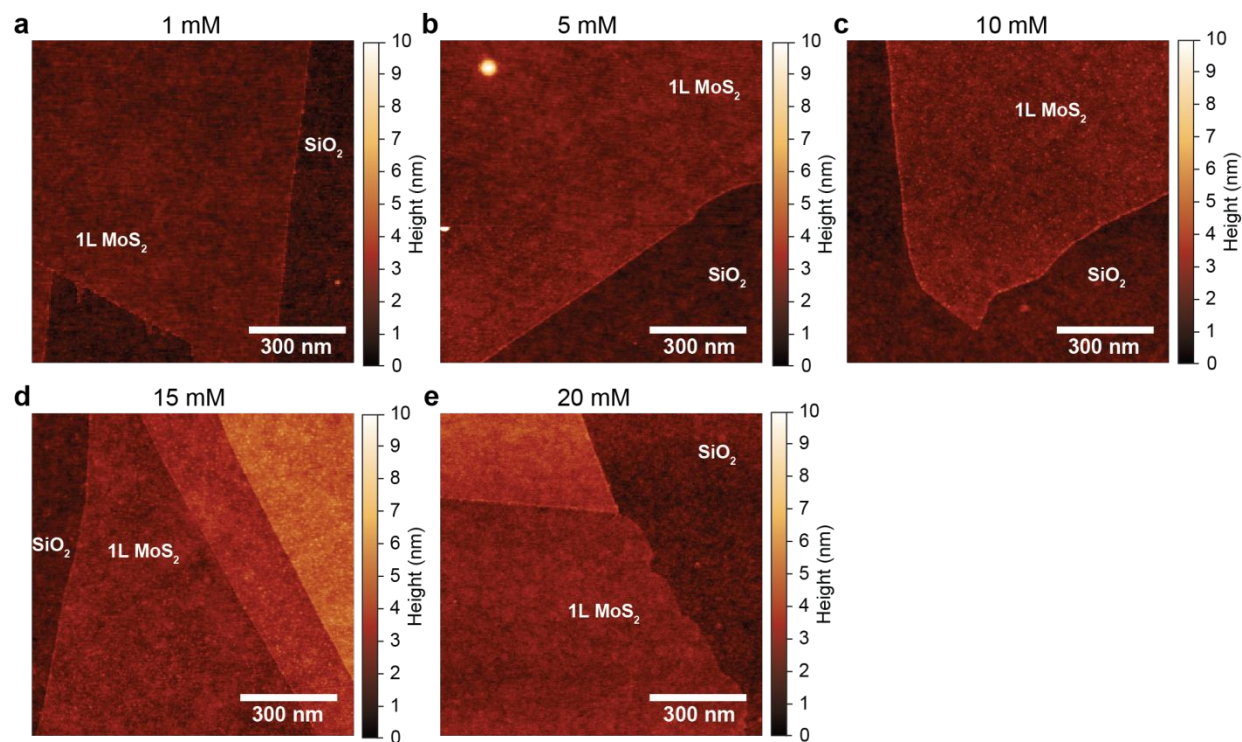

**Figure S2:** Atomic force microscopy (AFM) images of pristine MoS<sub>2</sub>. **(a)-(e)** AFM images of MoS<sub>2</sub> samples used for isotherm study. Samples are shown here before any functionalization occurs and monolayers are labeled as “1L MoS<sub>2</sub>”. The samples are then functionalized for 5 s using 4-NBD solutions with initial concentrations of 1 mM, 5 mM, 10 mM, 15 mM and 20 mM, respectively.

## AFM images from time dependence study

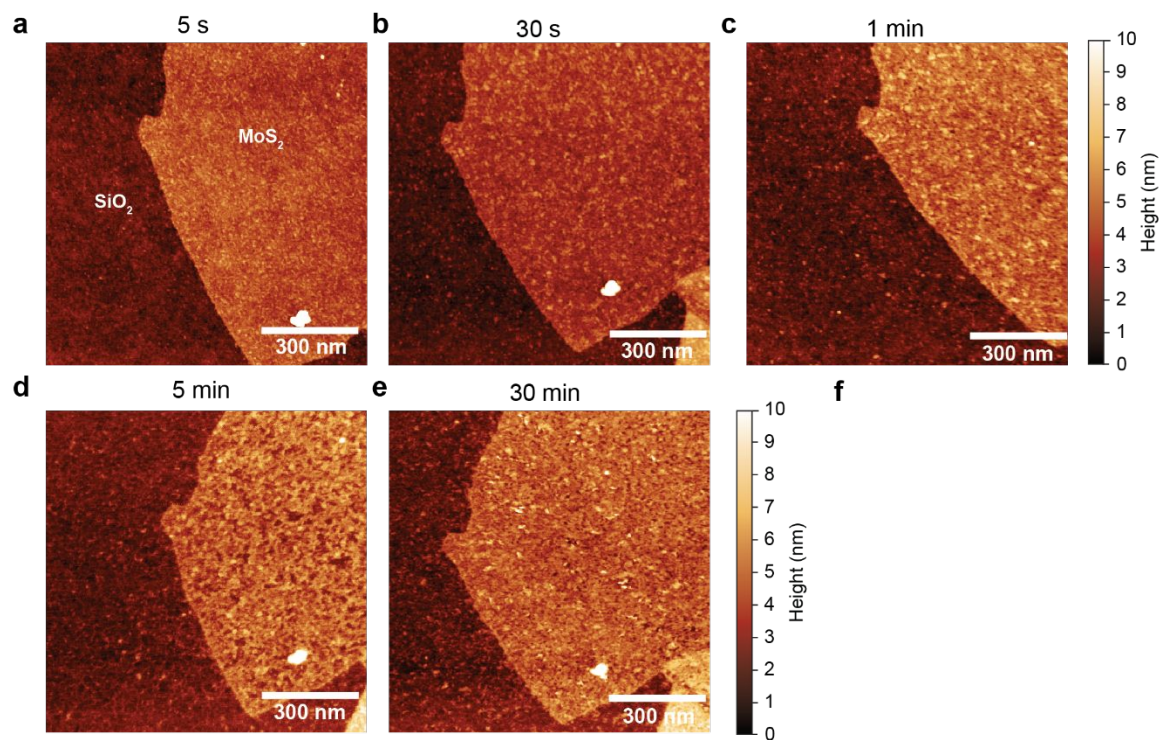

**Figure S3:** Time dependence of functionalization. **(a)-(e)** AFM images of monolayer MoS<sub>2</sub> taken after different reaction times in a 4-NBD solution of 5 mM concentration at reaction times of 5 s, 30 s, 1 min, 5 min, and 30 min.

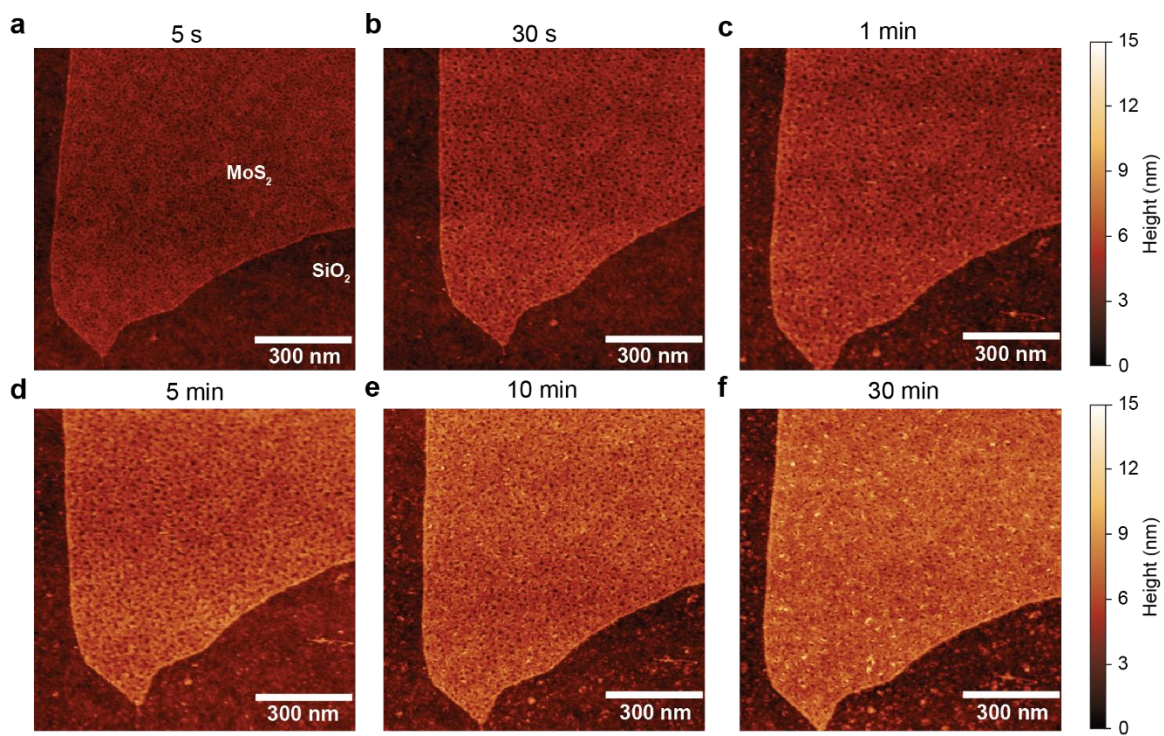

**Figure S4:** Time dependence of functionalization. **(a)-(f)** AFM images of monolayer  $\text{MoS}_2$  taken after different reaction times in a 4-NBD solution of 10 mM concentration at reaction times of 5 s, 30 s, 1 min, 5 min, 10 min and 30 min.



## AFM amplitude / peak force error images

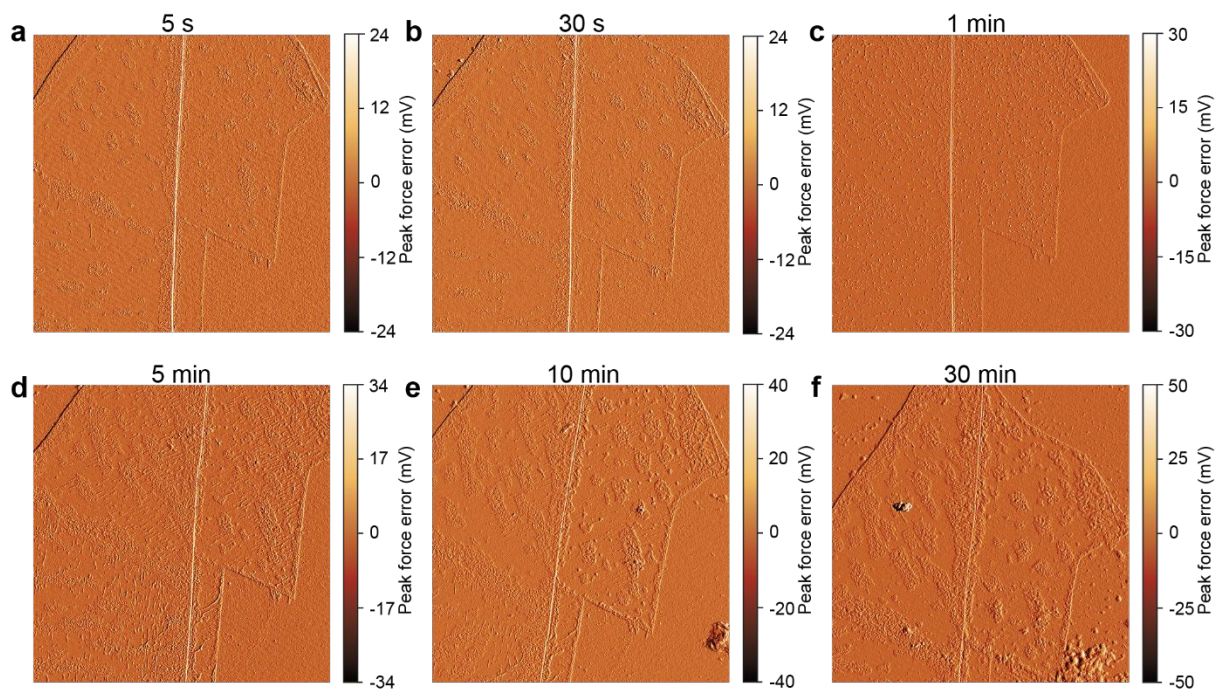

**Figure S5.** Time dependence of functionalization shown by amplitude / peak force error images, corresponding to the AFM topography images shown in Figure 6 of the main text. The 4-NBD reaction times are 5 s, 30 s, 1 min, 5 min, 10 min and 30 min.

## Scanning tunneling microscopy images

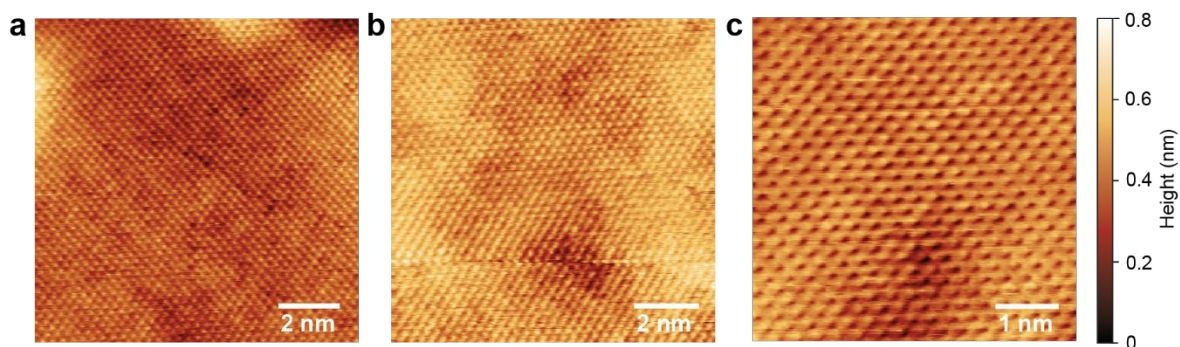

**Figure S6.** Representative scanning tunneling microscopy (STM) images of as-exfoliated pristine MoS<sub>2</sub> at different magnification levels. There are very few point defects in the MoS<sub>2</sub> surface prior to functionalization. STM imaging conditions: (a) 0.5 nA tunneling current, -1.5V applied bias; (b) 0.8 nA, -0.5 V; (c) 0.5 nA, -0.8V.

## Height change due to polymerization

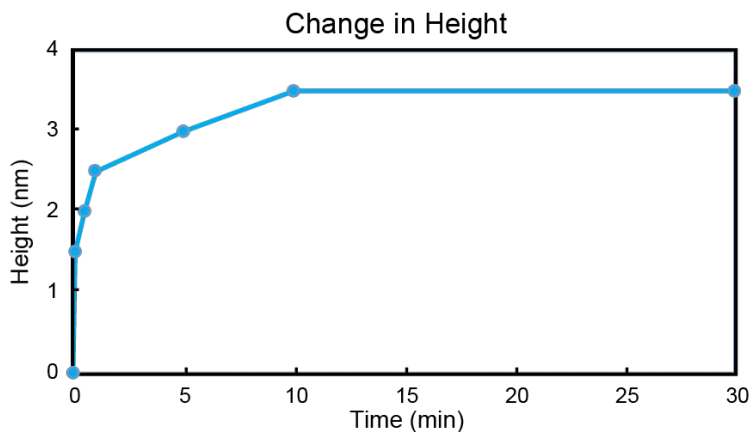

**Figure S7.** Change in height of features on MoS<sub>2</sub> surface as a function of reaction time from topographic data in Figure 6 of main text. The change in height is attributed to polymerization between molecules, and is much smaller and saturates at about 3.5 nm by 10 min, compared to the increase in lateral coverage due to covalent surface attachment, which continues for longer reaction times.

## References

- [1] Chu, X. M. S.; Yousaf, A.; Li, D. O.; Tang, A. L. A.; Debnath, A.; Ma, D.; Green, A. A.; Santos, E. J. G.; Wang, Q. H. Direct Covalent Chemical Functionalization of Unmodified Two-Dimensional Molybdenum Disulfide. *Chem. Mater.* **30**, 2112-2128 (2018).
- [2] Mignuzzi, S. et al. Effect of disorder on Raman scattering of single-layer MoS<sub>2</sub>. *Phys. Rev. B* **91**, 195411 (2015).
